# Supplementary material for: Metformin represses bladder cancer progression by inhibiting stem cell repopulation via COX2/PGE2/STAT3 axis
Source: PubMed Central journal article supplement (PMC5053723; doi:10.18632/oncotarget.8595), 2016-04-05
Supplement: oncotarget-07-28235-s001.pdf [file oncotarget-07-28235-s001.pdf]

SUPPLEMENTARY FIGURES AND TABLES

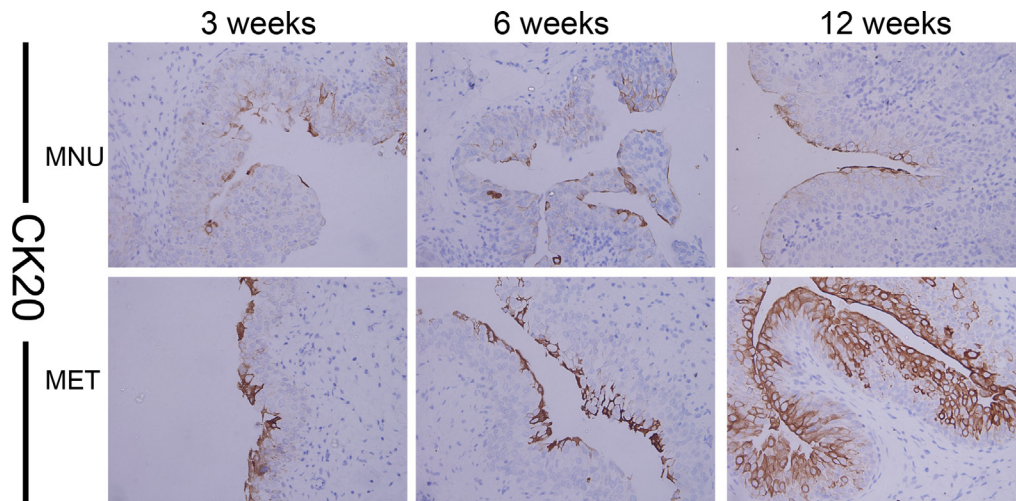

Supplementary Figure S1: Immunohistochemical analysis of CK20 in bladder lesions from the rats of both MNU and MET groups.

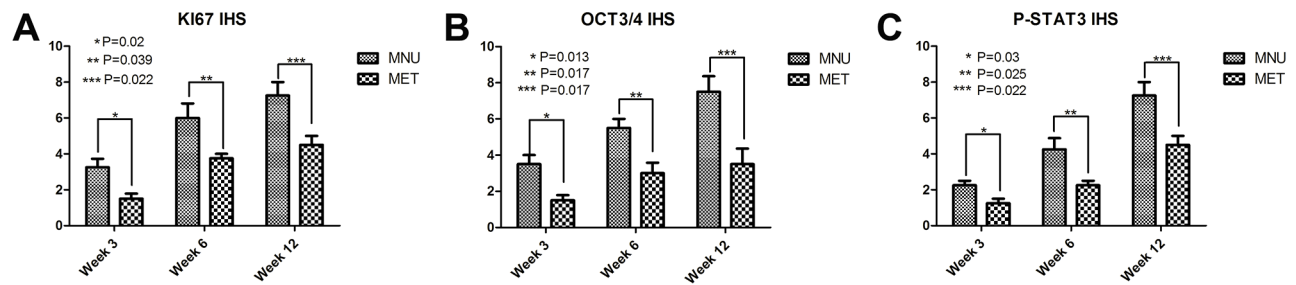

Supplementary Figure S2: The Immunohistochemical scores(IHS) of both MNU and MET groups at week 3, 6, 12.

Supplementary Table S1: The general features of the MNU-induced bladder cancer treated with or without MET at week 3

| NO. | Group   | Weight (g) | Glucose (mmol/L) | Hyperplasia/Dysplasia |          |        | Papillary | CIS | T1/T2 | SCC |
|-----|---------|------------|------------------|-----------------------|----------|--------|-----------|-----|-------|-----|
|     |         |            |                  | Mild                  | Moderate | Severe |           |     |       |     |
| 1   | Control | 185        | 7.9              | 0                     | 0        | 0      | 0         | 0   | 0     | 0   |
| 2   | Control | 189        | 8.0              | 0                     | 0        | 0      | 0         | 0   | 0     | 0   |
| 3   | Control | 185        | 8.1              | 0                     | 0        | 0      | 0         | 0   | 0     | 0   |
| 4   | Control | 188        | 7.9              | 0                     | 0        | 0      | 0         | 0   | 0     | 0   |
| 5   | Control | 182        | 7.4              | 0                     | 0        | 0      | 0         | 0   | 0     | 0   |
| 6   | Control | 182        | 7.8              | 0                     | 0        | 0      | 0         | 0   | 0     | 0   |
| 7   | Control | 183        | 8.1              | 0                     | 0        | 0      | 0         | 0   | 0     | 0   |
| 8   | Control | 180        | 8.0              | 0                     | 0        | 0      | 0         | 0   | 0     | 0   |
| 9   | Control | 185        | 7.5              | 0                     | 0        | 0      | 0         | 0   | 0     | 0   |
| 10  | Control | 183        | 8.0              | 0                     | 0        | 0      | 0         | 0   | 0     | 0   |
| 1   | MNU     | 170        | 10.0             | 2                     | 0        | 3      | 0         | 0   | 0     | 0   |
| 2   | MNU     | 174        | 9.8              | 4                     | 0        | 2      | 0         | 0   | 0     | 0   |
| 3   | MNU     | 170        | 10.5             | 1                     | 4        | 2      | 0         | 0   | 0     | 0   |
| 4   | MNU     | 201        | 11.1             | 3                     | 2        | 1      | 0         | 0   | 0     | 0   |
| 5   | MNU     | 200        | 11.8             | 2                     | 4        | 1      | 0         | 0   | 0     | 0   |
| 6   | MNU     | 176        | 6.6              | 0                     | 3        | 3      | 0         | 0   | 0     | 0   |
| 7   | MNU     | 175        | 7.8              | 4                     | 2        | 0      | 0         | 0   | 0     | 0   |
| 8   | MNU     | 185        | 7.5              | 2                     | 3        | 0      | 0         | 0   | 0     | 0   |
| 9   | MNU     | 189        | 5.3              | 4                     | 2        | 0      | 0         | 0   | 0     | 0   |
| 10  | MNU     | 187        | 7.0              | 2                     | 3        | 1      | 0         | 0   | 0     | 0   |
| 1   | MET     | 205        | 10.6             | 2                     | 1        | 0      | 0         | 0   | 0     | 0   |
| 2   | MET     | 208        | 8.1              | 3                     | 1        | 0      | 0         | 0   | 0     | 0   |
| 3   | MET     | 154        | 9.4              | 3                     | 1        | 3      | 0         | 0   | 0     | 0   |
| 4   | MET     | 187        | 8.8              | 3                     | 3        | 0      | 0         | 0   | 0     | 0   |
| 5   | MET     | 170        | 8.0              | 3                     | 1        | 0      | 0         | 0   | 0     | 0   |
| 6   | MET     | 173        | 6.3              | 5                     | 0        | 0      | 0         | 0   | 0     | 0   |
| 7   | MET     | 160        | 8.1              | 3                     | 1        | 0      | 0         | 0   | 0     | 0   |
| 8   | MET     | 184        | 6.5              | 3                     | 0        | 0      | 0         | 0   | 0     | 0   |
| 9   | MET     | 204        | 9.7              | 2                     | 2        | 0      | 0         | 0   | 0     | 0   |
| 10  | MET     | 209        | 8.1              | 1                     | 3        | 0      | 0         | 0   | 0     | 0   |

**Supplementary Table S2: The general features of the MNU-induced bladder cancer treated with or without MET at week 6**

| NO. | Group   | Weight (g) | Glucose (mmol/L) | Hyperplasia/Dysplasia |          |        | Papillary | CIS | T1/T2 | SCC |
|-----|---------|------------|------------------|-----------------------|----------|--------|-----------|-----|-------|-----|
|     |         |            |                  | Mild                  | Moderate | Severe |           |     |       |     |
| 1   | Control | 210        | 10.0             | 0                     | 0        | 0      | 0         | 0   | 0     | 0   |
| 2   | Control | 218        | 10.0             | 0                     | 0        | 0      | 0         | 0   | 0     | 0   |
| 3   | Control | 213        | 10.0             | 0                     | 0        | 0      | 0         | 0   | 0     | 0   |
| 4   | Control | 219        | 8.9              | 0                     | 0        | 0      | 0         | 0   | 0     | 0   |
| 5   | Control | 220        | 8.9              | 0                     | 0        | 0      | 0         | 0   | 0     | 0   |
| 6   | Control | 211        | 9.0              | 0                     | 0        | 0      | 0         | 0   | 0     | 0   |
| 7   | Control | 216        | 9.8              | 0                     | 0        | 0      | 0         | 0   | 0     | 0   |
| 8   | Control | 219        | 9.4              | 0                     | 0        | 0      | 0         | 0   | 0     | 0   |
| 9   | Control | 216        | 9.6              | 0                     | 0        | 0      | 0         | 0   | 0     | 0   |
| 10  | Control | 213        | 9.8              | 0                     | 0        | 0      | 0         | 0   | 0     | 0   |
| 1   | MNU     | 203        | 9.8              | 0                     | 4        | 6      | 0         | 1   | 0     | 0   |
| 2   | MNU     | 222        | 11.5             | 0                     | 1        | 4      | 0         | 2   | 0     | 0   |
| 3   | MNU     | 230        | 11.3             | 4                     | 1        | 0      | 0         | 0   | 0     | 0   |
| 4   | MNU     | 204        | 12.0             | 2                     | 4        | 0      | 0         | 0   | 0     | 0   |
| 5   | MNU     | 217        | 8.6              | 4                     | 0        | 0      | 0         | 0   | 0     | 0   |
| 6   | MNU     | 213        | 9.1              | 2                     | 3        | 1      | 0         | 0   | 0     | 0   |
| 7   | MNU     | 203        | 9.7              | 0                     | 3        | 2      | 0         | 0   | 0     | 0   |
| 8   | MNU     | 235        | 11.7             | 3                     | 1        | 0      | 0         | 0   | 0     | 0   |
| 1   | MET     | 150        | 7.4              | 4                     | 0        | 0      | 0         | 0   | 0     | 0   |
| 2   | MET     | 220        | 10.0             | 4                     | 1        | 0      | 0         | 0   | 0     | 0   |
| 3   | MET     | 218        | 11.0             | 4                     | 0        | 0      | 0         | 0   | 0     | 0   |
| 4   | MET     | 216        | 11.6             | 4                     | 0        | 0      | 0         | 0   | 0     | 0   |
| 5   | MET     | 217        | 11.3             | 3                     | 1        | 0      | 0         | 0   | 0     | 0   |
| 6   | MET     | 230        | 9.6              | 4                     | 0        | 0      | 0         | 0   | 0     | 0   |
| 7   | MET     | 199        | 11.2             | 2                     | 3        | 0      | 0         | 0   | 0     | 0   |
| 8   | MET     | 240        | 8.9              | 4                     | 0        | 0      | 0         | 0   | 0     | 0   |

Supplementary Table S3: The general features of the MNU-induced bladder cancer treated with or without MET at week 12

| NO. | Group   | Weight (g) | Glucose (mmol/L) | Hyperplasia/Dysplasia |          |        | Papillary | CIS | T1/T2 | SCC |
|-----|---------|------------|------------------|-----------------------|----------|--------|-----------|-----|-------|-----|
|     |         |            |                  | Mild                  | Moderate | Severe |           |     |       |     |
| 1   | Control | 230        | 7.5              | 0                     | 0        | 0      | 0         | 0   | 0     | 0   |
| 2   | Control | 230        | 7.6              | 0                     | 0        | 0      | 0         | 0   | 0     | 0   |
| 3   | Control | 228        | 7.9              | 0                     | 0        | 0      | 0         | 0   | 0     | 0   |
| 4   | Control | 223        | 7.6              | 0                     | 0        | 0      | 0         | 0   | 0     | 0   |
| 5   | Control | 231        | 7.9              | 0                     | 0        | 0      | 0         | 0   | 0     | 0   |
| 6   | Control | 239        | 8.0              | 0                     | 0        | 0      | 0         | 0   | 0     | 0   |
| 7   | Control | 239        | 8.0              | 0                     | 0        | 0      | 0         | 0   | 0     | 0   |
| 8   | Control | 242        | 7.9              | 0                     | 0        | 0      | 0         | 0   | 0     | 0   |
| 9   | Control | 215        | 9.0              | 0                     | 0        | 0      | 0         | 0   | 0     | 0   |
| 10  | Control | 234        | 8.1              | 0                     | 0        | 0      | 0         | 0   | 0     | 0   |
| 1   | MNU     | 265        | 5.8              | 0                     | 0        | 0      | 2         | 1   | 0     | 0   |
| 2   | MNU     | 230        | 6.5              | 0                     | 0        | 0      | 2         | 0   | 4     | 2   |
| 3   | MNU     | 263        | 6.4              | 0                     | 0        | 0      | 3         | 0   | 1     | 0   |
| 4   | MNU     | 252        | 7.5              | 0                     | 0        | 0      | 2         | 0   | 0     | 2   |
| 5   | MNU     | 250        | 7.0              | 0                     | 0        | 0      | 2         | 0   | 4     | 3   |
| 6   | MNU     | 290        | 4.9              | 0                     | 0        | 0      | 0         | 0   | 4     | 2   |
| 7   | MNU     | 240        | 6.3              | 0                     | 0        | 0      | 3         | 0   | 0     | 0   |
| 8   | MNU     | 198        | 5.7              | 0                     | 0        | 0      | 1         | 1   | 3     | 0   |
| 9   | MNU     | 220        | 6.1              | 0                     | 0        | 0      | 2         | 0   | 4     | 7   |
| 10  | MNU     | 231        | 9.0              | 0                     | 0        | 0      | 0         | 0   | 1     | 0   |
| 11  | MNU     | 228        | 11.3             | 0                     | 0        | 0      | 0         | 1   | 2     | 1   |
| 12  | MNU     | 198        | 8.3              | 0                     | 0        | 0      | 0         | 0   | 3     | 1   |
| 13  | MNU     | 181        | 5.7              | 0                     | 0        | 0      | 0         | 0   | 2     | 0   |
| 14  | MNU     | 216        | 14.5             | 0                     | 0        | 0      | 2         | 0   | 0     | 0   |
| 1   | MET     | 248        | 7.7              | 0                     | 0        | 0      | 2         | 0   | 2     | 2   |
| 2   | MET     | 256        | 7.4              | 0                     | 0        | 0      | 3         | 0   | 0     | 0   |
| 3   | MET     | 232        | 7.8              | 0                     | 0        | 0      | 2         | 0   | 1     | 2   |
| 4   | MET     | 270        | 7.8              | 0                     | 0        | 0      | 1         | 0   | 2     | 3   |
| 5   | MET     | 250        | 5.8              | 0                     | 0        | 0      | 2         | 0   | 0     | 0   |
| 6   | MET     | 235        | 5.9              | 0                     | 0        | 0      | 2         | 0   | 2     | 0   |
| 7   | MET     | 204        | 5.5              | 0                     | 0        | 0      | 3         | 0   | 0     | 2   |
| 8   | MET     | 190        | 4.4              | 0                     | 0        | 0      | 0         | 0   | 4     | 6   |
| 9   | MET     | 197        | 5.3              | 0                     | 0        | 0      | 3         | 0   | 0     | 0   |

(Continued)

| NO. | Group | Weight (g) | Glucose (mmol/L) | Hyperplasia/Dysplasia |          |        | Papillary | CIS | T1/T2 | SCC |
|-----|-------|------------|------------------|-----------------------|----------|--------|-----------|-----|-------|-----|
|     |       |            |                  | Mild                  | Moderate | Severe |           |     |       |     |
| 10  | MET   | 182        | 4.8              | 0                     | 0        | 0      | 4         | 0   | 0     | 1   |
| 11  | MET   | 200        | 6.8              | 0                     | 0        | 0      | 2         | 0   | 0     | 0   |
| 12  | MET   | 223        | 4.2              | 0                     | 0        | 0      | 3         | 0   | 2     | 2   |
| 13  | MET   | 200        | 4.6              | 0                     | 0        | 0      | 4         | 0   | 2     | 2   |
| 14  | MET   | 209        | 4.7              | 0                     | 0        | 0      | 2         | 0   | 1     | 0   |
| 15  | MET   | 206        | 9.6              | 0                     | 0        | 0      | 3         | 0   | 2     | 1   |
| 16  | MET   | 171        | 9.7              | 0                     | 0        | 0      | 3         | 0   | 0     | 0   |
| 17  | MET   | 212        | 10.8             | 0                     | 0        | 0      | 4         | 0   | 1     | 0   |
| 18  | MET   | 243        | 9.8              | 0                     | 0        | 0      | 3         | 0   | 0     | 0   |
| 19  | MET   | 197        | 11.4             | 0                     | 0        | 0      | 4         | 0   | 0     | 0   |
| 20  | MET   | 241        | 3.7              | 0                     | 0        | 0      | 3         | 0   | 2     | 4   |

Supplementary Table S4: Immunohistochemical scores(IHS) of KI-67, OCT3/4 and P-stat3

| Weeks   | Group | IHS   |        |         |
|---------|-------|-------|--------|---------|
|         |       | KI-67 | OCT3/4 | P-stat3 |
| Week 3  | MNU   | 4     | 4      | 2       |
|         | MNU   | 3     | 4      | 2       |
|         | MNU   | 4     | 4      | 3       |
|         | MNU   | 2     | 2      | 2       |
|         | MET   | 2     | 2      | 1       |
|         | MET   | 1     | 2      | 2       |
|         | MET   | 2     | 1      | 1       |
|         | MET   | 1     | 1      | 1       |
| Week 6  | MNU   | 4     | 6      | 3       |
|         | MNU   | 8     | 6      | 6       |
|         | MNU   | 6     | 6      | 4       |
|         | MNU   | 6     | 4      | 4       |
|         | MET   | 4     | 4      | 2       |
|         | MET   | 3     | 4      | 3       |
|         | MET   | 4     | 2      | 2       |
|         | MET   | 4     | 2      | 2       |
| Week 12 | MNU   | 6     | 9      | 6       |
|         | MNU   | 9     | 6      | 9       |
|         | MNU   | 8     | 9      | 6       |
|         | MNU   | 6     | 6      | 8       |
|         | MET   | 4     | 2      | 4       |
|         | MET   | 4     | 3      | 4       |
|         | MET   | 6     | 6      | 4       |
|         | MET   | 4     | 3      | 6       |
